# Supplementary material for: Mapping and Candidate Gene Prediction of qPL7-25: A Panicle Length QTL in Dongxiang Wild Rice
Source: MDPI journal article supplement (doi:10.3390/agriculture13081623), 2023-08-18
Supplement: s1 [file s1]

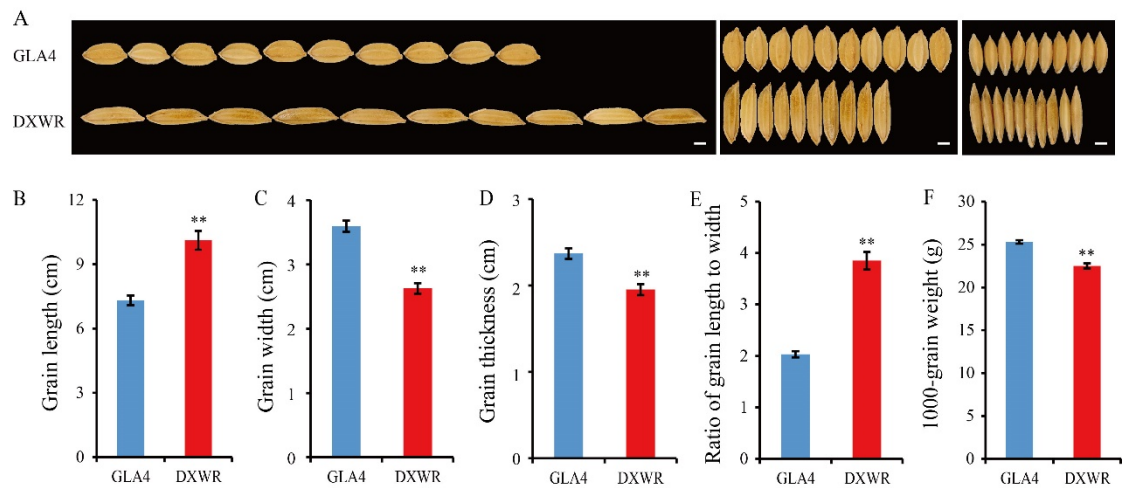

**Supplementary Figure S1.** The morphology and grain size comparisons of mature grains from GLA4 and DXWR. (A) The morphology of mature grains from GLA4 and DXWR, bar=2 cm. (B-F) Comparisons of grain length (B), grain width (C), grain thickness (D), ratio of grain length to width (E) and 1000-grain weight (F) ( $n \geq 100$  in B-E and  $n = 3$  in F). Data are shown as means  $\pm$  SD. \*\* indicate a significant difference between DXWR and GLA4 at 0.01 levels according to *t*-test.

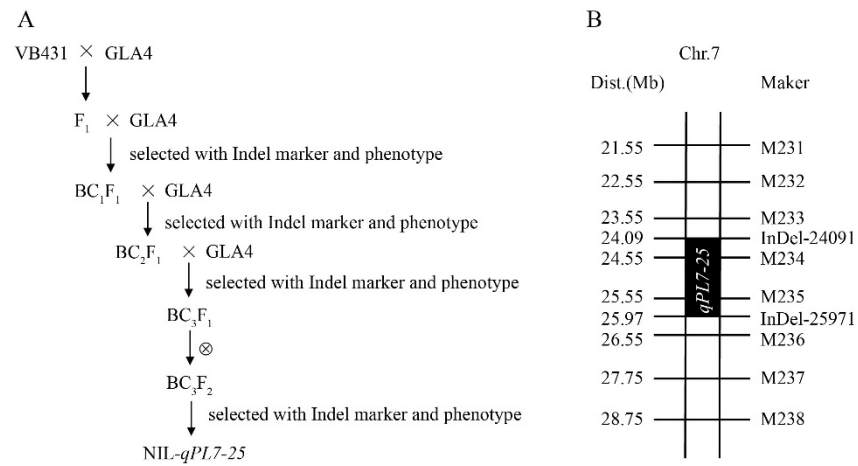

**Supplementary Figure S2.** Construction of NIL (A) and linkage map of *qPL7-25* on chromosome 7 in the NIL (B).

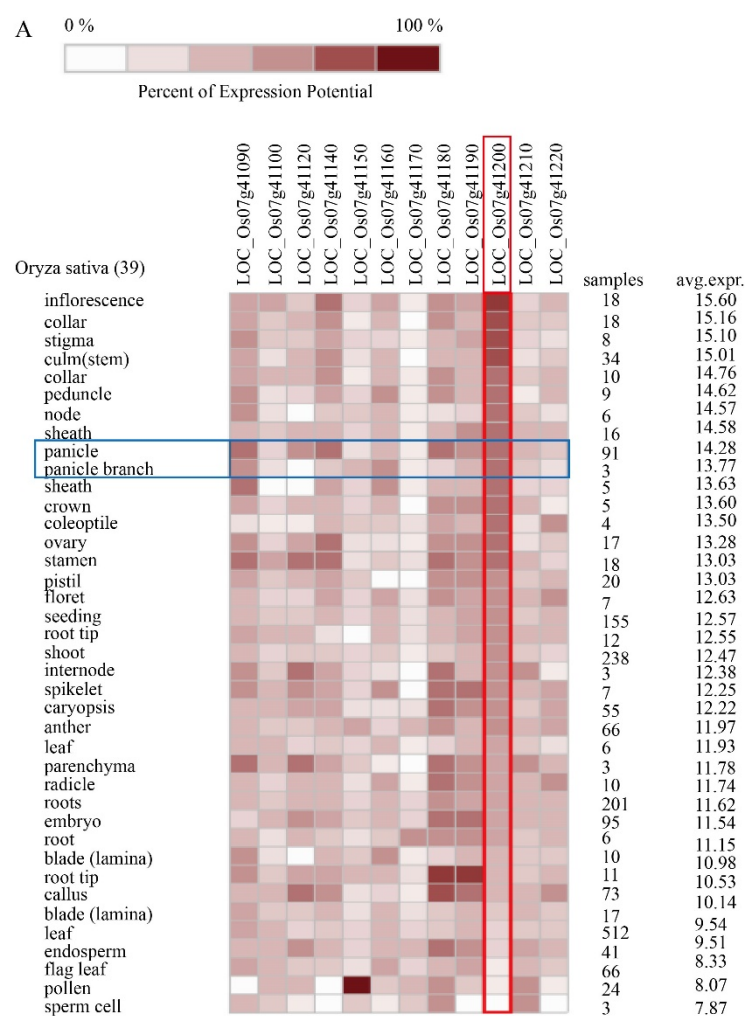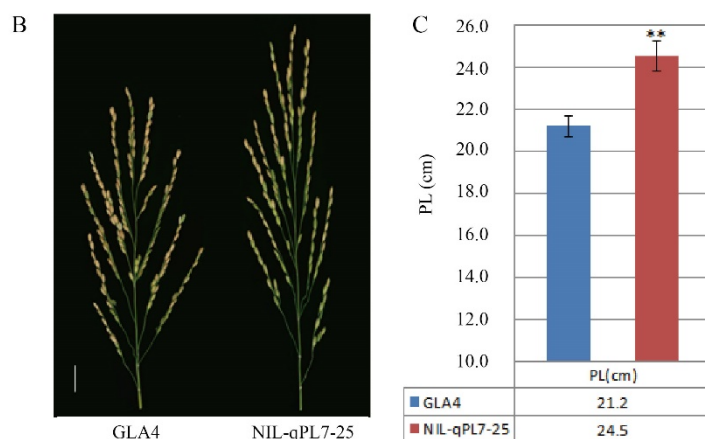

**Supplementary Figure S3.** Expression patterns of candidate genes. (A) Expression heat map of candidate genes in different tissues. (B) Comparison of panicle phenotypes between NIL-*qPL7-25* and GLA4. (C) Comparisons of panicle length between NIL-*qPL7-25* and GLA4 ( $n = 5$ ). Data are shown as means  $\pm$  SD. \*\* indicate a significant difference between NIL-*qPL7-25* and GLA4 at 0.01 levels according to *t*-test.

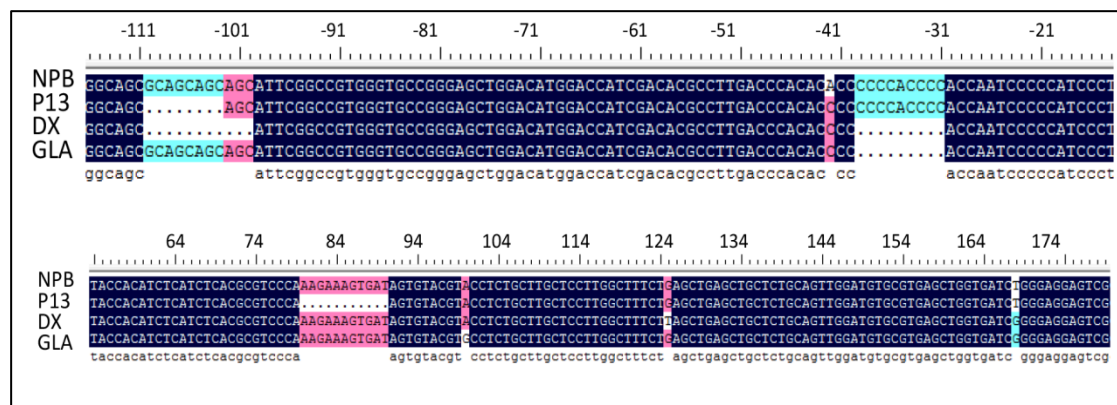

**Supplementary Figure S4.** Sequence alignment of promoter region and 5'UTR region of *GL7* gene. NPB, Nipponbare; P13, Ping13; DX, Dongxiang wild rice; GLA, Guangluai 4.

**Supplementary Table S1.** InDel primers used in fine mapping of *qPL7-25*.

| Marker      | Forward primers           | Reverse primers           | Product size/bp |
|-------------|---------------------------|---------------------------|-----------------|
| InDel-24091 | TGCATCAAGGGGTGTTTACATGG   | CGTCTCGCAGATGATTAGCTCTTAT | 138             |
| InDel-24477 | CTCCGGCAGTTCAGGCTTTG      | CTCGTGCAGCTCCATCGGC       | 130             |
| InDel-24554 | TGCGAGTGTTTTGCAGTTTACTG   | AATATGGTATTGGTACGGCCGC    | 114             |
| InDel-24591 | GGGATAAAGGGAGTCCTAT       | AGCGAGTATAAATGCCCCAC      | 104             |
| InDel-24710 | TGTCCCATCTACCCAGAAGTTGTT  | ACTACAGGCATCTCCCTCTTGAGG  | 123             |
| InDel-24736 | TAGTATGTGCTGCTGTTCCCTGTGC | CCGCAAGCGAACAAGAGAAG      | 112             |
| InDel-24811 | GTTGGTGTCTAAGGAGGGTCCTG   | CACTCCGGCCTGCATCTAGG      | 171             |
| InDel-24973 | AGTTAGGTGGCCCGATCCC       | GACCTCGAGCTGGATTCCCTT     | 171             |
| InDel-25971 | TTTCTAGCATTGTCCACATT      | CATTCATATTGATGTTAGTAAATC  | 120             |

**Supplementary Table S2.** Predicted ORF on RGAP.

| ORF    | Candidate gene | Putative function                                             |
|--------|----------------|---------------------------------------------------------------|
| ORF1   | LOC_Os07g41090 | Histone deacetylase                                           |
| ORF 2  | LOC_Os07g41100 | Conserved hypothetical protein                                |
| ORF 3  | LOC_Os07g41110 | Retrotransposon protein                                       |
| ORF 4  | LOC_Os07g41120 | RNA recognition motif containing protein                      |
| ORF 5  | LOC_Os07g41140 | Receptor-like protein kinase precursor                        |
| ORF 6  | LOC_Os07g41150 | Glycerophosphoryl diester phosphodiesterase family protein    |
| ORF 7  | LOC_Os07g41160 | Protein of unknown function DUF1675 domain containing protein |
| ORF 8  | LOC_Os07g41170 | Expressed protein                                             |
| ORF 9  | LOC_Os07g41180 | RNA-binding protein-like                                      |
| ORF 10 | LOC_Os07g41190 | WD domain, G-beta repeat domain containing protein            |
| ORF 11 | LOC_Os07g41200 | Grain Length on Chromosome 7; LONGIFOLIA protein; grain width |
| ORF 12 | LOC_Os07g41210 | Negative regulator of GL7                                     |
| ORF 13 | LOC_Os07g41220 | Peptidase aspartic family protein                             |
| ORF 14 | LOC_Os07g41230 | Methyl esterase-like                                          |

Abbreviation: ORF, open reading frame.

**Supplementary Table S3.** Data collection of main agronomic traits of Huazhan and NIL-Huazhan-*GL7<sup>P13</sup>* in Hangzhou.

| Traits                         | Huazhan   | NIL-Huazhan- <i>GL7<sup>P13</sup></i> |
|--------------------------------|-----------|---------------------------------------|
| Plant height (cm)              | 103.1±1.8 | 112.9±1.5**                           |
| Panicle length (cm)            | 24.1±0.7  | 26.5±0.5**                            |
| Primary branch number          | 11.0±0.4  | 12.2±0.6*                             |
| Secondary branch number        | 42.8±1.1  | 39.0±1.5**                            |
| Spikelet number per panicle    | 206.0±8.7 | 200.7±4.3                             |
| Grain length (cm)              | 8.5±0.1   | 10.1±0.3**                            |
| Grain width (cm)               | 2.4±0.1   | 2.3±0.1                               |
| Ratio of grain length to width | 3.54±0.12 | 4.37±0.20**                           |
| 1000-grain weight (g)          | 20.2±0.4  | 20.9±0.5                              |
| Grain yield per plant (g)      | 37.5±1.6  | 35.3±1.2                              |

Data are shown as means ± SD ( $n = 5$ ). \* and \*\* indicate a significant difference between Huazhan and NIL-Huazhan-*GL7<sup>P13</sup>* at 0.05 and 0.01 levels by *t*-test, respectively.

**Supplementary Table S4.** Data collection of main agronomic traits of GLA4 and NIL-*qPL7-25* in Hangzhou.

| Traits                         | GLA4      | NIL- <i>qPL7-25</i> |
|--------------------------------|-----------|---------------------|
| Plant height (cm)              | 83.7±1.3  | 86.4±1.7*           |
| Panicle length (cm)            | 21.2±0.5  | 24.5±0.4**          |
| Primary branch number          | 11.7±0.5  | 12.9±0.7*           |
| Secondary branch number        | 22.6±0.3  | 21.0±0.9*           |
| Spikelet number per panicle    | 122.9±5.0 | 131.4±4.1*          |
| Grain length (cm)              | 7.7±0.1   | 8.5±0.3**           |
| Grain width (cm)               | 3.4±0.1   | 3.3±0.2             |
| Ratio of grain length to width | 2.26±0.08 | 2.58±0.13**         |
| 1000-grain weight (g)          | 25.5±0.3  | 25.6±0.1            |
| Grain yield per plant (g)      | 17.3±0.4  | 18.0±0.5            |

Data are shown as means ± SD ( $n = 5$ ). \* and \*\* indicate a significant difference between GLA4 and NIL-*qPL7-25* at 0.05 and 0.01 levels by *t*-test, respectively.
